# Supplementary material for: Insights into Bacterial Communities and Diversity of Mangrove Forest Soils along the Upper Gulf of Thailand in Response to Environmental Factors
Source: MDPI journal article supplement (doi:10.3390/biology11121787), 2022-12-08
Supplement: s1 [file s1]

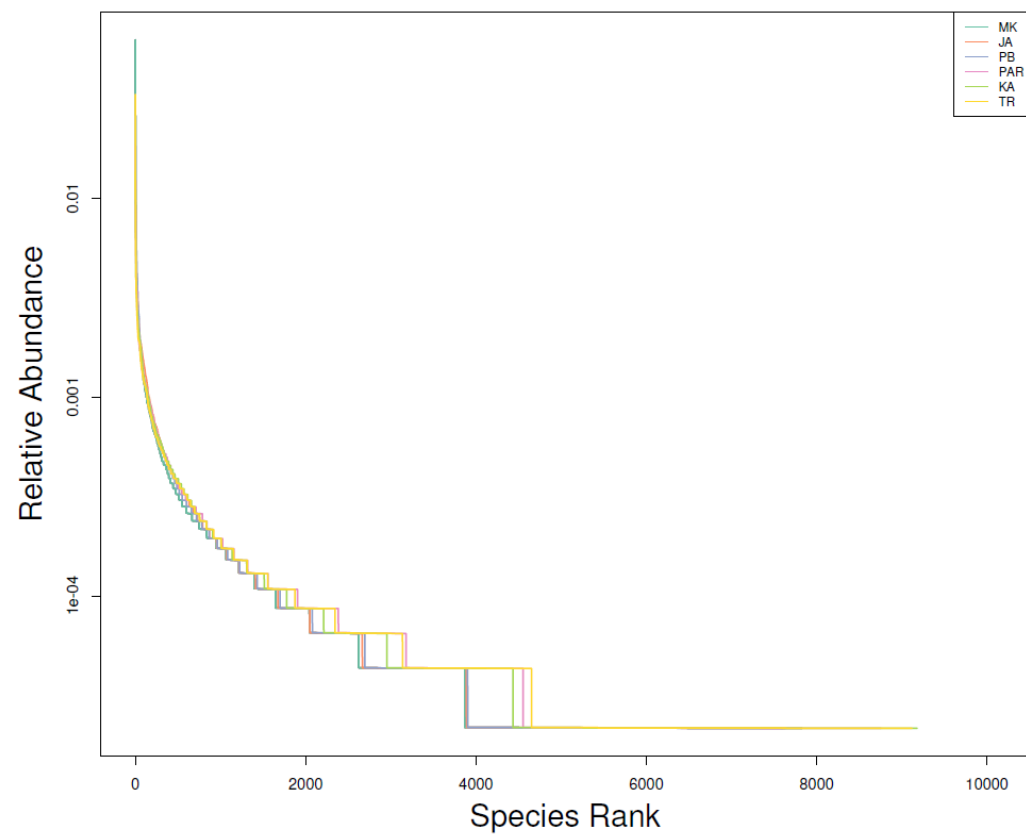

**Supplementary Figure S1.** Rank abundance curve of observed species in mangrove forest soils. The site codes are in accordance with those listed in Table 1.
