# Supplementary material for: Insights into Bacterial Communities and Diversity of Mangrove Forest Soils along the Upper Gulf of Thailand in Response to Environmental Factors
Source: MDPI journal article supplement (doi:10.3390/biology11121787), 2022-12-08
Supplement: s1 [file s1]

**Supplementary Table S1.** Raw sequence and taxonomically classified sequence data of triplicate samples.

| Sample name | Total raw reads | Combined reads | Percent efficiency (%) | Total tag | Taxon Tag | Unclassified Tag | Unique Tag | Observed species |
|-------------|-----------------|----------------|------------------------|-----------|-----------|------------------|------------|------------------|
| MK1         | 136,008         | 133,168        | 97.91                  | 116887    | 103457    | 8601             | 4829       | 3656             |
| MK2         | 125,666         | 122,954        | 97.84                  | 91177     | 80248     | 90               | 10839      | 8337             |
| MK3         | 137,034         | 134,189        | 97.92                  | 102840    | 91590     | 176              | 11074      | 8366             |
| KA1         | 132,400         | 128,063        | 96.72                  | 72462     | 64399     | 755              | 7308       | 6711             |
| KA2         | 139,470         | 135,637        | 97.25                  | 90960     | 78759     | 756              | 11445      | 7091             |
| KA3         | 116,525         | 113,184        | 97.13                  | 91241     | 80128     | 1129             | 9984       | 7030             |
| TR1         | 125,116         | 121,123        | 96.81                  | 90768     | 80286     | 71               | 10411      | 8019             |
| TR2         | 125,931         | 123,581        | 98.13                  | 97508     | 86116     | 127              | 11265      | 7957             |
| TR3         | 131,265         | 126,894        | 96.67                  | 73097     | 64871     | 151              | 8075       | 6240             |
| JA1         | 97,031          | 93,804         | 96.67                  | 53210     | 46302     | 252              | 6656       | 6175             |
| JA2         | 125,366         | 123,107        | 98.2                   | 83650     | 74753     | 295              | 8602       | 7141             |
| JA3         | 126,294         | 124,010        | 98.19                  | 95507     | 82345     | 301              | 12861      | 8529             |
| PAR1        | 71,751          | 70,278         | 97.95                  | 87735     | 72297     | 89               | 15349      | 8788             |
| PAR2        | 110,465         | 107,217        | 97.06                  | 96869     | 80943     | 130              | 15796      | 8975             |
| PAR3        | 130,455         | 127,974        | 98.1                   | 77509     | 64223     | 187              | 13099      | 8553             |
| PB1         | 123,079         | 119,740        | 97.29                  | 91325     | 78696     | 385              | 12244      | 9596             |
| PB2         | 129,158         | 126,117        | 97.65                  | 94299     | 82412     | 290              | 11597      | 7945             |
| PB3         | 98,856          | 95,436         | 96.54                  | 91923     | 78800     | 297              | 12826      | 9372             |
